# Supplementary material
Source: PubMed Central journal article supplement (PMC1891247)
Supplement: pnas_0608635104_1.pdf [file pnas_0608635104_1.pdf]

**Table 2. Neutralization of viruses pseudotyped with subtype CRF07\_B'C Envs by sera from donors from Xinjiang, China**

| Env clone | 1/Serum neutralizing titer |               |               |               |           |            |               |       |       |
|-----------|----------------------------|---------------|---------------|---------------|-----------|------------|---------------|-------|-------|
|           | No.1                       | No.2          | No.5          | No.6          | No.7      | No.10      | No.11         | No.13 | No.14 |
| No.1-27   | <b>80</b>                  | <10           | 320           | 160           | <10       | 320        | 160           | 320   | 80    |
| No.2-138  | <10                        | <b>&lt;10</b> | 640           | 640           | <10       | 640        | 40            | 640   | 640   |
| No.5-4    | <10                        | <10           | <b>&lt;10</b> | <10           | <10       | 80         | <10           | <10   | <10   |
| No.6-15   | <10                        | <10           | 40            | <b>&lt;10</b> | <10       | <10        | <10           | <10   | <10   |
| No.7-102  | <10                        | <10           | <10           | <10           | <b>40</b> | 320        | 20            | <10   | <10   |
| No.8-145  | <10                        | <10           | 160           | 40            | <10       | 20         | <10           | 40    | 10    |
| No.9-26   | <10                        | <10           | 640           | 40            | <10       | 320        | 10            | 160   | 80    |
| No.10-35  | <10                        | <10           | <10           | <10           | <10       | <b>160</b> | <10           | 40    | <10   |
| No.11-65  | <10                        | <10           | 640           | 160           | <10       | 160        | <b>&lt;10</b> | 80    | 320   |

Homologous neutralization results are shown in bold. Titers are shown as 50% neutralization endpoints.
