# Supplementary material
Source: PubMed Central journal article supplement (PMC1891247)

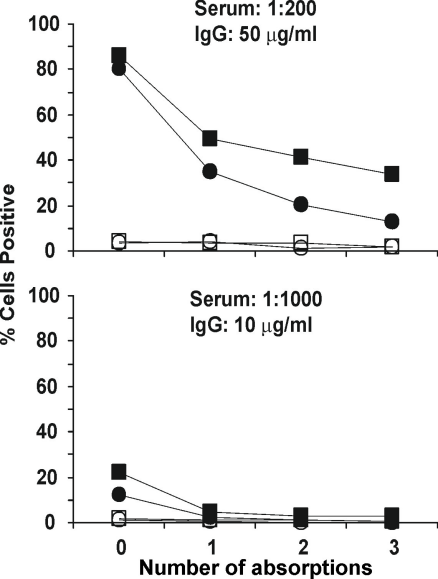

Supplement: pnas_0608635104_2.pdf [file pnas_0608635104_2.pdf]

**Unabsorbed****Absorbed**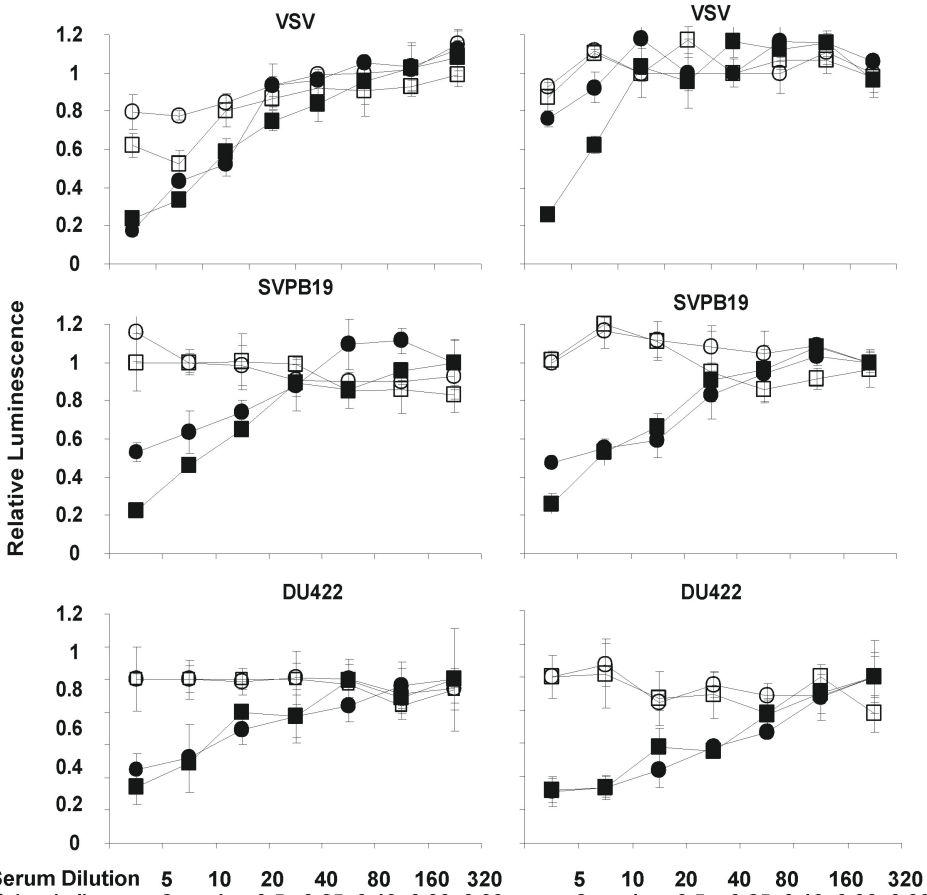

1/Serum Dilution 5 10 20 40 80 160 320  
 IgG (mg/ml) 2 1 0.5 0.25 0.13 0.06 0.03

5 10 20 40 80 160 320  
 2 1 0.5 0.25 0.13 0.06 0.03

Supplement: pnas_0608635104_3.pdf [file pnas_0608635104_3.pdf]
